# Supplementary material
Source: ML conference proceedings conference paper supplement (https://www.ecva.net/papers/eccv_2022/papers_ECCV/html/136710691_ECCV_2022_paper.php)
Supplement: Supplementary file 1 [file 136710691-supp.pdf]

# Descriptions about the final version

According to the suggestions of Reviewers and Meta-Reviewers, we have added the additional results mentioned in the rebuttal stage to the revised manuscript. Please see the Table 3, Table 4 and Table 5. Besides, the demonstration of the gradient conflict isn't added to this paper because of the limitation of the paper pages.

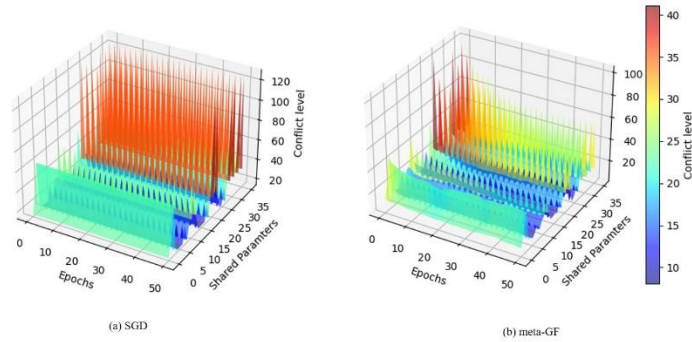

Fig.1 Gradient conflict
